# Supplementary material for: Influence of neutral auxiliary ligands on crystal structure and magnetic behaviour of new [MnII2MnIII2] clusters supported by p-adamantylcalix[4]arene
Source: Royal Society of Chemistry journal article supplement (doi:10.1039/d3nj04809h), 2023-11-20
Supplement: d3nj04809h1.pdf [file d3nj04809h1.pdf]

## Electronic Supplementary Information for

# Influence of the Auxiliary Ligands on Crystal Structure and Magnetic Behavior of New $[\text{Mn}^{\text{II}}_2\text{Mn}^{\text{III}}_2]$ Clusters Supported by *p*-Adamantylcalix[4]arene

Alexander S. Ovsyannikov<sup>a\*</sup>, Iuliia V. Strelnikova<sup>a,b</sup>, Aida I. Samigullina<sup>c</sup>, Daut R. Islamov<sup>d</sup>, Mikhail A. Cherosov<sup>a</sup>, Ruslan G. Batulin<sup>a</sup>, Airat G. Kiiamov<sup>a</sup>, Aidar T. Gubaidullin<sup>b</sup>, Pavel V. Dorovatovskii<sup>e</sup>, Svetlana E. Solovieva<sup>a</sup>, Igor S. Antipin<sup>a</sup>

<sup>a</sup>*Kazan Federal University, Kremlevskaya 18 str., 420008 Kazan, Russian Federation;*

<sup>b</sup>*A. E. Arbuzov Institute of Organic and Physical Chemistry, FRC Kazan Scientific Center, Russian Academy of Sciences, Arbuzova 8 str., 420088 Kazan, Russian Federation;*

<sup>c</sup>*N. D. Zelinsky Institute of Organic Chemistry, Russian Academy of Sciences, Leninsky avenue 47, 119991 Moscow, Russian Federation;*

<sup>d</sup>*Laboratory for structural analysis of biomacromolecules, FRC Kazan Scientific Center, Russian Academy of Sciences, Lobachevskogo 2/31 str., 420111 Kazan, Russian Federation;*

<sup>e</sup>*National Research Center "Kurchatov Institute", Acad. Kurchatov 1 Sq., 123182 Moscow, Russian Federation*

\*Corresponding author: [osaalex2007@rambler.ru](mailto:osaalex2007@rambler.ru)

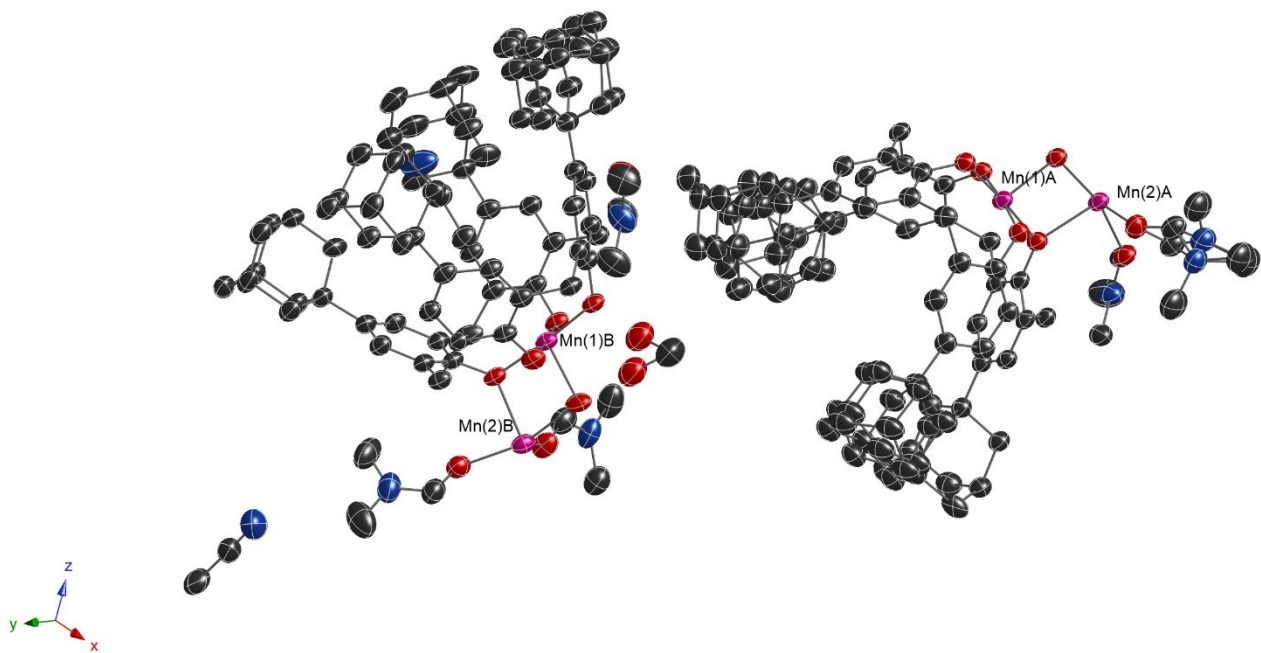

**a**

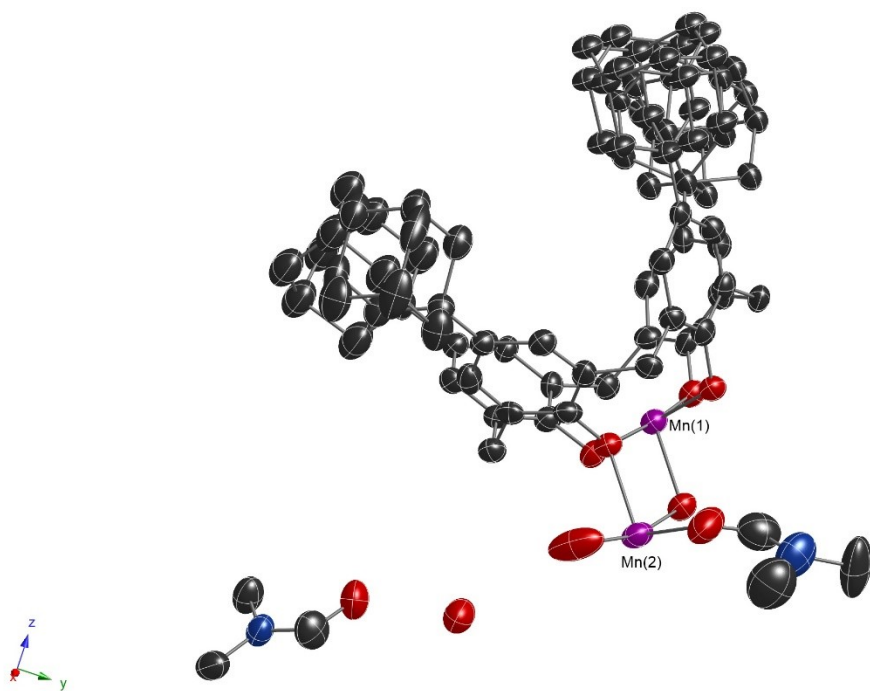

**b**

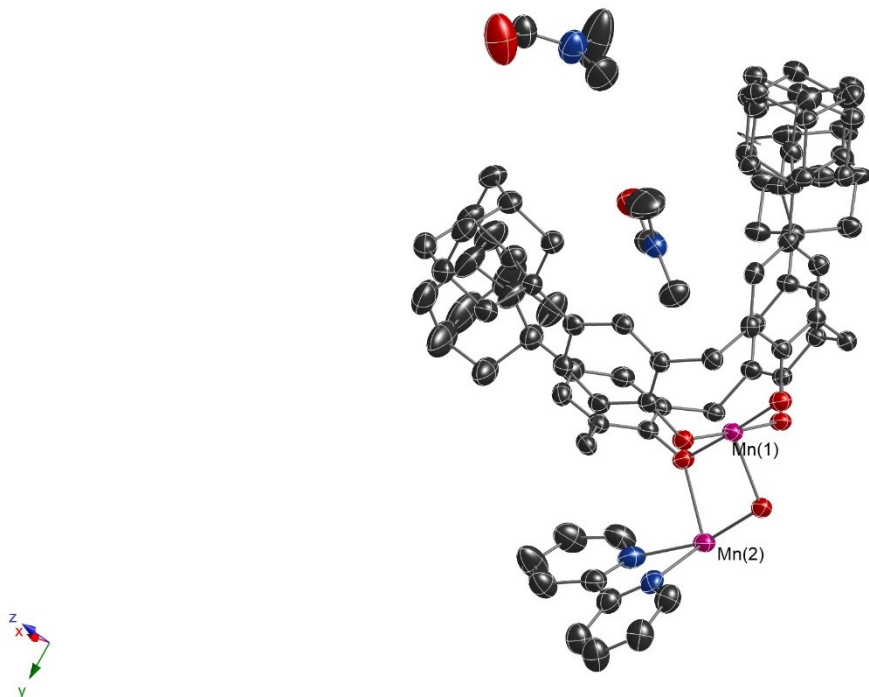

c

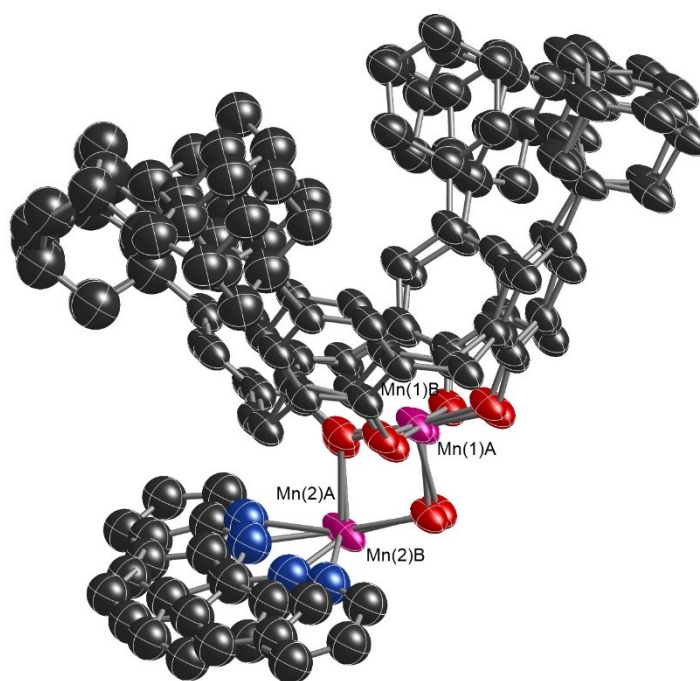

d

**Figure S1.** The thermal ellipsoids representation with 50% probability of asymmetric unit for (a)  $3_2\text{-Mn}_4(\text{dmf})_4$ , (b)  $3_2\text{-Mn}_4(\text{dmf})_2(\text{H}_2\text{O})_2$ , (c)  $3_2\text{-Mn}_4(\text{bipy})_2$ , (d)  $3_2\text{-Mn}_4(\text{phen})_2$ , H-atoms are omitted for clarity.

#### Details of refinement procedure for crystal structures of studied Mn-complexes

For  $3_2\text{-Mn}_4(\text{dmf})_4$ , C(30), C(31), C(32), C(33), C(34), C(35), C(36), C(37), C(38) atoms are found to be disordered over two positions with occupancies 0.80:0.20; C(40), C(41), C(42), C(43), C(44), C(45), C(46), C(47), C(48) atoms – with occupancies 0.76:0.24; C(60), C(61), C(62), C(63), C(64), C(65), C(66), C(67), C(68) – with occupancies 0.85:0.15 (all belonging to adamantyl groups); C(76), N(77), C(78), C(79) atoms – with occupancies 0.73:0.27 (all belonging to coordinated DMF molecule); O(91) atom – with occupancies 0.81:0.19 (belonging to MeOH molecule).

For **3<sub>2</sub>-Mn<sub>4</sub>(dmf)<sub>2</sub>(H<sub>2</sub>O)<sub>2</sub>**, C(30), C(31), C(32), C(33), C(34), C(35), C(36), C(37), C(38), C(60), C(61), C(62), C(63), C(64), C(65), C(66), C(67), C(68) are found to be disordered over two positions with occupancies 0.50:0.50 (all belonging to adamantyl groups). For **3<sub>2</sub>-Mn<sub>4</sub>(bipy)<sub>2</sub>**, the disordering model with 0.68:0:38 occupancies for C-atoms belonging to one adamantyl group (C(50):C(51), C(52):C(53), C(54):C(55), C(56):C(57), C(58):C(59), C(60):C(67), C(61):C(62), C(63):C(64), C(65):C(66)) per asymmetric unit was applied in order to refine the structure. For **3<sub>2</sub>-Mn<sub>4</sub>(phen)<sub>2</sub>**, the disordering model with 0.57:0:43 occupancies for all C-, H-, N-, O- and Mn-atoms per asymmetric unit was applied in order to refine the structure.

### Checkcif reports responses

For **3<sub>2</sub>-Mn<sub>4</sub>(dmf)<sub>2</sub>(H<sub>2</sub>O)<sub>2</sub>** (CCDC 2299404), the Alerts of B level appeared upon checkcif procedure:  
230\_ALERT\_2\_B Hirshfeld Test Diff for C49 -C51 . 8.8 s.u.

**Response:** *This Alert A is caused by a poor quality of the crystal. Unfortunately, all attempts to obtain the crystal of better quality were failed.*

420\_ALERT\_2\_B D—H Bond Without Acceptor O6 --H6A . Please Check

420\_ALERT\_2\_B D—H Bond Without Acceptor O6 --H6B . Please Check

**Response:** *Crystal structure of the compound contains squeezed electron density, corresponding to disordered solvent molecules, which could be an acceptor for this bond.*

For **3<sub>2</sub>-Mn<sub>4</sub>(bipy)<sub>2</sub>** (CCDC 2299407), the Alerts of B level appeared upon checkcif procedure:  
029\_ALERT\_3\_B\_diffm\_measured\_fraction\_theta\_full value Low . 0.959 Why?

**Response:** *For the performed synchrotron experiment, only  $\phi$ -scanning was carried out, which didn't not allow to collect more data for crystals in the lowest syngonies and with low reflectivity.*

420\_ALERT\_2\_B D—H Bond Without Acceptor O5 --H5 . Please Check

**Response:** *Crystal structure of the compound contains squeezed solvent molecules which could be an acceptor for this bond.*

For **3<sub>2</sub>-Mn<sub>4</sub>(phen)<sub>2</sub>** (CCDC 2299405), the Alerts of A and B level appeared upon checkcif procedure:  
SHFSU01\_ALERT\_2\_A The absolute value of parameter shift to su ratio > 0.20

Absolute value of the parameter shift to su ratio given 1.744

Additional refinement cycles may be required.

080\_ALERT\_2\_A Maximum Shift/Error ..... 1.45 Why ?

**Response:** *These Alerts A are caused by a poor diffraction ability of the crystal and related with a high disordering of calix[4]arene moieties as well as the metallic cluster units. Additionally, the crystal contains large pores (the solvent accessible volume is 23.8%, calculated by PLATON<sup>1</sup>), filled by highly disordered solvent molecules, which also significantly contributed in diminishing its reflection ability.*

084\_ALERT\_3\_B High wR2 Value (i.e. > 0.25) ..... 0.42 Report

**Response:** *The crystal was of poor quality. The molecule contains a large number of disordered fragments, which further reduces the reflection ability of the crystal.*

420\_ALERT\_2\_B D—H Bond Without Acceptor O5A --H5A . Please Check

**Response:** *The crystal structure contains squeezed electron density that correspond to disordered solvate molecules with potential hydrogen bond acceptors for a mentioned hydrogen atom.*

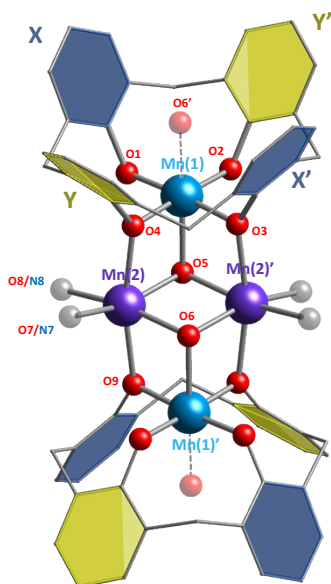

**Scheme S1.** An overall scheme of obtained  $\{\text{Mn}_4\}$ -clusters with adopted atoms numeration, denoted in the tables below (dihedral angle  $\angle XX' < \text{dihedral angle } \angle YY'$ ). Mn(1), Mn(2) and O-atoms are represented as light blue and violet spheres, respectively. Grey spheres represent the coordinated O-/N- atoms of solvate molecules or N,N'-chelating auxiliary ligands)

**Table S1.** Coordination bond distances of Mn(1)-atoms for complexes  $3_2\text{-Mn}_4(\text{dmf})_4$ ,  $3_2\text{-Mn}_4(\text{dmf})_2(\text{H}_2\text{O})_2$ ,  $3_2\text{-Mn}_4(\text{bipy})_2$  and  $3_2\text{-Mn}_4(\text{phen})_2$ , and comparison with those earlier reported for compounds  $1_2\text{-Mn}_4(\text{dmf})_6^2$ ,  $1_2\text{-Mn}_4(\text{dmf})_4(\text{H}_2\text{O})_2^2$ ,  $2_2\text{-Mn}_4(\text{bipy})_2(\text{MeOH})_2^3$ . The independent cluster molecules and disordered molecules, presenting in the unit cell, are denoted as MolA, MolB and MolA\*, MolB\*, respectively. The independent cluster molecules and disordered molecules, presenting in the unit cell, are denoted as MolA, MolB and MolA\*, MolB\*, respectively.

|                                  | OX | $3_2\text{-Mn}_4(\text{dmf})_4$ |          | $1_2\text{-Mn}_4(\text{dmf})_6$ | $3_2\text{-Mn}_4(\text{dmf})_2(\text{H}_2\text{O})_2$ | $1_2\text{-Mn}_4(\text{dmf})_4(\text{H}_2\text{O})_2$ | $3_2\text{-Mn}_4(\text{bipy})_2$ | $2_2\text{-Mn}_4(\text{bipy})_2$ |          |          | $3_2\text{-Mn}_4(\text{phen})_2$ |         |
|----------------------------------|----|---------------------------------|----------|---------------------------------|-------------------------------------------------------|-------------------------------------------------------|----------------------------------|----------------------------------|----------|----------|----------------------------------|---------|
|                                  |    | Mol(A)                          | Mol(B)   |                                 |                                                       |                                                       |                                  | Mol(A)                           | Mol(B)   |          | Mol(A)*                          | Mol(B)* |
| $d_{\text{Mn}(1)\text{-OX}}$ , Å | O1 | 1.891(3)                        | 1.899(3) | 1.925(1)                        | 1.914(5)                                              | 1.944(8)                                              | 1.899(2)                         | 1.917(7)                         | 1.921(7) | 1.919(6) | 1.91(1)                          | 1.89(2) |
|                                  | O2 | 1.892(2)                        | 1.911(2) | 1.924(1)                        | 1.884(6)                                              | 1.933(8)                                              | 1.900(2)                         | 1.922(6)                         | 1.875(6) | 1.902(7) | 1.89(1)                          | 1.89(2) |
|                                  | O3 | 1.963(3)                        | 1.961(3) | 1.967(1)                        | 1.950(6)                                              | 1.999(8)                                              | 1.952(2)                         | 1.968(6)                         | 1.962(7) | 1.982(6) | 1.94(2)                          | 1.95(3) |
|                                  | O4 | 1.958(3)                        | 1.952(2) | 1.957(1)                        | 1.961(6)                                              | 1.949(8)                                              | 1.953(2)                         | 1.958(6)                         | 1.970(6) | 1.947(6) | 1.97(2)                          | 1.93(2) |
|                                  | O5 | 2.073(3)                        | 2.075(3) | 2.145(2)                        | 2.063(6)                                              | 2.153(7)                                              | 2.092(2)                         | 2.145(6)                         | 2.173(6) | 2.156(6) | 2.10(1)                          | 2.14(1) |
|                                  | O6 | -                               | -        | 2.298(2)                        | -                                                     | 2.311(9)                                              | -                                | 2.456(7)                         | 2.388(7) | 2.433(7) | -                                | -       |

**Table S2.** Coordination bond angles of Mn(1)-atoms for complexes  $3_2\text{-Mn}_4(\text{dmf})_4$ ,  $3_2\text{-Mn}_4(\text{dmf})_2(\text{H}_2\text{O})_2$ ,  $3_2\text{-Mn}_4(\text{bipy})_2$  and  $3_2\text{-Mn}_4(\text{phen})_2$ , and comparison with those earlier reported for compounds  $1_2\text{-Mn}_4(\text{dmf})_6^2$ ,  $1_2\text{-Mn}_4(\text{dmf})_4(\text{H}_2\text{O})_2^2$ ,  $2_2\text{-Mn}_4(\text{bipy})_2(\text{MeOH})_2^3$ . The independent cluster molecules and disordered molecules, presenting in the unit cell, are denoted as MolA, MolB and MolA\*, MolB\*, respectively.

|                                                   | OX/OY  | $3_2\text{-Mn}_4(\text{dmf})_4$ |          | $1_2\text{-Mn}_4(\text{dmf})_6$ | $3_2\text{-Mn}_4(\text{dmf})_2(\text{H}_2\text{O})_2$ | $1_2\text{-Mn}_4(\text{dmf})_4(\text{H}_2\text{O})_2$ | $3_2\text{-Mn}_4(\text{bipy})_2$ | $2_2\text{-Mn}_4(\text{bipy})_2$ |          |          | $3_2\text{-Mn}_4(\text{phen})_2$ |          |
|---------------------------------------------------|--------|---------------------------------|----------|---------------------------------|-------------------------------------------------------|-------------------------------------------------------|----------------------------------|----------------------------------|----------|----------|----------------------------------|----------|
|                                                   |        | Mol(A)                          | Mol(B)   |                                 |                                                       |                                                       |                                  | Mol(A)                           | Mol(B)   |          | Mol(A)*                          | Mol(B)*  |
| $\angle \text{OX} - \text{Mn}(1) - \text{OY}$ , ° | O1/O2  | 91.5(1)                         | 90.1(1)  | 90.04(7)                        | 90.8(2)                                               | 90.6(3)                                               | 91.37(9)                         | 91.9(3)                          | 91.9(3)  | 91.0(3)  | 89.2(5)                          | 90.5(7)  |
|                                                   | O1/O3  | 175.5(1)                        | 175.5(1) | 175.95(7)                       | 178.6(2)                                              | 174.2(3)                                              | 176.83(9)                        | 175.9(3)                         | 177.3(3) | 176.9(3) | 177.7(7)                         | 177(1)   |
|                                                   | O1/O4  | 90.0(1)                         | 90.8(1)  | 90.46(7)                        | 91.2(2)                                               | 89.1(3)                                               | 90.62(9)                         | 89.0(3)                          | 89.5(3)  | 89.8(3)  | 89.9(6)                          | 93.5(8)  |
|                                                   | O1/O5  | 99.2(1)                         | 101.6(1) | 95.38(6)                        | 97.8(2)                                               | 93.4(2)                                               | 98.93(9)                         | 93.9(3)                          | 97.6(2)  | 95.6(2)  | 93.0(5)                          | 106.1(6) |
|                                                   | O2/O3  | 90.5(1)                         | 90.3(1)  | 91.01(6)                        | 89.3(2)                                               | 90.3(3)                                               | 90.22(9)                         | 89.6(3)                          | 89.8(3)  | 91.0(3)  | 92.9(7)                          | 90.7(9)  |
|                                                   | O2/O4  | 174.4(1)                        | 177.2(1) | 177.61(7)                       | 174.3(2)                                              | 174.5(3)                                              | 176.03(9)                        | 176.0(3)                         | 178.2(3) | 176.8(3) | 174.5(6)                         | 175.1(8) |
|                                                   | O2/O5  | 101.9(1)                        | 99.6(1)  | 96.34(6)                        | 102.1(2)                                              | 90.6(2)                                               | 99.91(9)                         | 94.6(3)                          | 99.0(2)  | 95.8(2)  | 101.7(5)                         | 98.4(6)  |
|                                                   | O3/O4  | 87.7(1)                         | 88.7(1)  | 88.33(6)                        | 88.6(2)                                               | 89.5(3)                                               | 87.63(8)                         | 89.3(2)                          | 88.7(3)  | 88.0(2)  | 87.8(7)                          | 85(1)    |
|                                                   | O3/O5  | 84.4(1)                         | 82.8(1)  | 80.61(6)                        | 83.5(2)                                               | 80.9(2)                                               | 83.49(8)                         | 82.1(2)                          | 80.1(2)  | 81.8(2)  | 87.5(7)                          | 76.6(9)  |
|                                                   | O4/O5  | 83.2(1)                         | 82.8(1)  | 81.29(6)                        | 83.0(2)                                               | 83.9(2)                                               | 83.16(8)                         | 81.4(2)                          | 79.7(2)  | 81.0(2)  | 83.8(5)                          | 83.2(7)  |
|                                                   | O1/O6' | -                               | -        | 92.87(6)                        | -                                                     | 94.6(3)                                               | -                                | 92.2(3)                          | 92.4(3)  | 90.1(2)  | -                                | -        |
|                                                   | O2/O6' | -                               | -        | 94.46(6)                        | -                                                     | 97.1(3)                                               | -                                | 92.6(3)                          | 92.1(3)  | 95.7(2)  | -                                | -        |
|                                                   | O3/O6' | -                               | -        | 90.95(6)                        | -                                                     | 91.0(2)                                               | -                                | 91.6(2)                          | 89.6(3)  | 92.1(2)  | -                                | -        |
|                                                   | O4/O6' | -                               | -        | 87.85(6)                        | -                                                     | 88.5(3)                                               | -                                | 91.3(3)                          | 88.9(3)  | 87.4(2)  | -                                | -        |
|                                                   | O5/O6' | -                               | -        | 166.39(6)                       | -                                                     | 168.9(2)                                              | -                                | 170.3(2)                         | 164.7(2) | 167.0(2) | -                                | -        |

**Table S3.** Coordination bond distances of Mn(2)-atoms for complexes  $3_2\text{-Mn}_4(\text{dmf})_4$ ,  $3_2\text{-Mn}_4(\text{dmf})_2(\text{H}_2\text{O})_2$ ,  $3_2\text{-Mn}_4(\text{bipy})_2$  and  $3_2\text{-Mn}_4(\text{phen})_2$ , and comparison with those earlier reported for compounds  $1_2\text{-Mn}_4(\text{dmf})_6^2$ ,  $1_2\text{-Mn}_4(\text{dmf})_4(\text{H}_2\text{O})_2^2$ ,  $2_2\text{-Mn}_4(\text{bipy})_2(\text{MeOH})_2^3$ .

$\text{Mn}_4(\text{dmf})_6^2$ ,  $1_2\text{-Mn}_4(\text{dmf})_4(\text{H}_2\text{O})_2^2$ ,  $2_2\text{-Mn}_4(\text{bipy})_2(\text{MeOH})_2^3$ . The independent cluster molecules and disordered molecules, presenting in the unit cell, are denoted as MolA, MolB and MolA\*, MolB\*, respectively.

|                                  | OX/NX        | $3_2\text{-Mn}_4(\text{dmf})_4$ |          | $1_2\text{-Mn}_4(\text{dmf})_6$ |          | $3_2\text{-Mn}_4(\text{dmf})_2(\text{H}_2\text{O})_2$ | $1_2\text{-Mn}_4(\text{dmf})_4(\text{H}_2\text{O})_2$ | $3_2\text{-Mn}_4(\text{bipy})_2$ | $2_2\text{-Mn}_4(\text{bipy})_2$ |          | $3_2\text{-Mn}_4(\text{phen})_2$ |          |          |
|----------------------------------|--------------|---------------------------------|----------|---------------------------------|----------|-------------------------------------------------------|-------------------------------------------------------|----------------------------------|----------------------------------|----------|----------------------------------|----------|----------|
|                                  |              | Mol(A)                          | Mol(B)   | Mol(A)*                         | Mol(B)*  |                                                       |                                                       |                                  | Mol(A)                           | Mol(B)   | Mol(A)*                          | Mol(B)*  |          |
| $d_{\text{Mn}(2)\text{-O}}$<br>Å | <b>O4</b>    | 2.220(3)                        | 2.204(3) | 2.218(2)                        | 2.218(2) | 2.198(5)                                              | 2.270(7)                                              | 2.211(2)                         | 2.171(6)                         | 2.194(6) | 2.267(5)                         | 2.27(1)  | 2.12(2)  |
|                                  | <b>O5</b>    | 2.177(3)                        | 2.201(2) | 2.169(1)                        | 2.169(1) | 2.167(7)                                              | 2.202(8)                                              | 2.103(2)                         | 2.124(6)                         | 2.149(6) | 2.133(7)                         | 2.17(1)  | 2.16(1)  |
|                                  | <b>O6</b>    | 2.159(3)                        | 2.193(3) | 2.162(1)                        | 2.162(1) | 2.179(6)                                              | 2.196(8)                                              | 2.148(2)                         | 2.139(6)                         | 2.133(7) | 2.149(6)                         | 2.14(1)  | 2.16(1)  |
|                                  | <b>O7/N7</b> | 2.143(3)                        | 2.198(3) | 2.223(9)                        | 2.04(2)  | 2.138(9)                                              | 2.181(8)                                              | 2.175(3)                         | 2.220(7)                         | 2.245(8) | 2.259(8)                         | 2.232(8) | 2.21(1)  |
|                                  | <b>O8/N8</b> | 2.154(3)                        | 2.134(3) | 2.27(1)                         | 2.125(4) | 2.17(1)                                               | 2.198(9)                                              | 2.272(3)                         | 2.243(9)                         | 2.259(8) | 2.245(8)                         | 2.237(7) | 2.235(9) |
|                                  | <b>O9</b>    | 2.204(3)                        | 2.136(3) | 2.216(2)                        | 2.216(2) | 2.221(6)                                              | 2.190(6)                                              | 2.201(2)                         | 2.249(6)                         | 2.267(5) | 2.194(6)                         | 2.20(2)  | 2.21(3)  |

**Table S4.** Coordination bond angles of Mn(2)-atoms for obtained complexes  $3_2\text{-Mn}_4(\text{dmf})_4$ ,  $3_2\text{-Mn}_4(\text{dmf})_2(\text{H}_2\text{O})_2$ ,  $3_2\text{-Mn}_4(\text{bipy})_2$  and  $3_2\text{-Mn}_4(\text{phen})_2$ , and comparison with those earlier reported for compounds  $1_2\text{-Mn}_4(\text{dmf})_6^2$ ,  $1_2\text{-Mn}_4(\text{dmf})_4(\text{H}_2\text{O})_2^2$ ,  $2_2\text{-Mn}_4(\text{bipy})_2(\text{MeOH})_2^3$ . The independent cluster molecules and disordered molecules, presenting in the unit cell, are denoted as MolA, MolB and MolA\*, MolB\*, respectively.

|                                                                                                                                                                         | OX/OY<br>or<br>OX/NY<br>or<br>NX/NY | $3_2\text{-Mn}_4(\text{dmf})_4$ |           | $1_2\text{-Mn}_4(\text{dmf})_6$ |           | $3_2\text{-Mn}_4(\text{dmf})_2(\text{H}_2\text{O})_2$ | $1_2\text{-Mn}_4(\text{dmf})_4(\text{H}_2\text{O})_2$ | $3_2\text{-Mn}_4(\text{bipy})_2$ | $2_2\text{-Mn}_4(\text{bipy})_2$ |          | $3_2\text{-Mn}_4(\text{phen})_2$ |          |          |
|-------------------------------------------------------------------------------------------------------------------------------------------------------------------------|-------------------------------------|---------------------------------|-----------|---------------------------------|-----------|-------------------------------------------------------|-------------------------------------------------------|----------------------------------|----------------------------------|----------|----------------------------------|----------|----------|
|                                                                                                                                                                         |                                     | Mol(A)                          | Mol(B)    | Mol(A)*                         | Mol(B)*   |                                                       |                                                       |                                  | Mol(A)                           | Mol(B)   | Mol(A)*                          | Mol(B)*  |          |
| $\angle \text{OX} - \text{Mn}(2) - \text{OY}$ , °<br>or<br>$\angle \text{OX} - \text{Mn}(2) - \text{NY}$ , °<br>or<br>$\angle \text{NX} - \text{Mn}(2) - \text{NY}$ , ° | <b>O4/O5</b>                        | 75.03(9)                        | 74.47(9)  | 75.14(6)                        | 75.14(6)  | 75.3(2)                                               | 75.8(2)                                               | 76.99(8)                         | 77.2(2)                          | 75.5(2)  | 74.6(2)                          | 75.4(4)  | 78.5(6)  |
|                                                                                                                                                                         | <b>O4/O6</b>                        | 91.85(9)                        | 92.72(9)  | 95.83(6)                        | 95.83(6)  | 95.5(2)                                               | 88.3(2)                                               | 91.89(8)                         | 93.2(2)                          | 90.4(2)  | 92.3(2)                          | 93.6(5)  | 88.3(6)  |
|                                                                                                                                                                         | <b>O4/O7</b><br>or<br><b>O4/N7</b>  | 89.5(1)                         | 85.6(1)   | 87.2(2)                         | 89.7(4)   | 89.8(3)                                               | 86.9(2)                                               | 86.84(9)                         | 89.3(3)                          | 90.5(3)  | 82.3(2)                          | 88.8(4)  | 91.5(6)  |
|                                                                                                                                                                         | <b>O4/O8</b><br>or<br><b>O4/N8</b>  | 102.1(1)                        | 103.3(1)  | 103.6(3)                        | 95.1(1)   | 102.8(3)                                              | 92.8(2)                                               | 107.90(9)                        | 109.5(3)                         | 113.1(2) | 104.3(2)                         | 103.5(4) | 111.9(6) |
|                                                                                                                                                                         | <b>O4/O9</b>                        | 166.62(9)                       | 165.30(9) | 167.54(6)                       | 167.54(6) | 165.7(2)                                              | 163.9(2)                                              | 167.51(8)                        | 168.1(2)                         | 161.6(2) | 161.6(2)                         | 168.4(6) | 159.4(9) |
|                                                                                                                                                                         | <b>O5/O6</b>                        | 83.92(9)                        | 83.0(1)   | 84.16(6)                        | 84.16(6)  | 82.2(2)                                               | 82.6(2)                                               | 84.13(8)                         | 82.8(2)                          | 85.5(2)  | 85.5(2)                          | 86.4(4)  | 85.9(5)  |
|                                                                                                                                                                         | <b>O5/O7</b><br>or<br><b>O5/N7</b>  | 164.5(1)                        | 160.0(1)  | 161.8(2)                        | 164.0(4)  | 163.6(3)                                              | 162.3(3)                                              | 162.0(1)                         | 163.8(3)                         | 160.3(3) | 156.6(2)                         | 163.9(4) | 165.1(5) |
|                                                                                                                                                                         | <b>O5/O8</b><br>or<br><b>O5/N8</b>  | 94.7(1)                         | 95.2(1)   | 88.4(3)                         | 96.5(1)   | 100.7(3)                                              | 82.2(2)                                               | 103.21(9)                        | 102.6(3)                         | 99.7(2)  | 108.8(3)                         | 104.5(3) | 96.5(4)  |
|                                                                                                                                                                         | <b>O5/O9</b>                        | 96.35(9)                        | 95.80(9)  | 95.32(6)                        | 95.32(6)  | 92.8(2)                                               | 99.1(2)                                               | 96.82(8)                         | 96.2(2)                          | 92.3(2)  | 90.4(2)                          | 94.2(6)  | 98.9(8)  |
|                                                                                                                                                                         | <b>O6/O7</b><br>or<br><b>O6/N7</b>  | 95.7(1)                         | 96.2(1)   | 93.4(2)                         | 103.0(4)  | 92.7(3)                                               | 100.9(3)                                              | 104.4(1)                         | 107.2(3)                         | 108.8(3) | 99.7(2)                          | 97.3(3)  | 104.9(4) |
|                                                                                                                                                                         | <b>O6/O8</b><br>or<br><b>O6/N8</b>  | 165.2(1)                        | 162.8(1)  | 156.6(3)                        | 168.8(1)  | 161.7(3)                                              | 164.0(2)                                              | 159.9(1)                         | 157.3(3)                         | 156.6(2) | 160.3(3)                         | 161.5(4) | 159.7(5) |
|                                                                                                                                                                         | <b>O6/O9</b>                        | 76.88(9)                        | 74.90(9)  | 74.93(6)                        | 74.93(6)  | 74.9(2)                                               | 75.8(2)                                               | 76.57(8)                         | 76.0(2)                          | 74.6(2)  | 75.5(2)                          | 80.2(6)  | 71.1(8)  |
|                                                                                                                                                                         | <b>O7/O8</b><br>or<br><b>N7/N8</b>  | 89.5(1)                         | 91.3(1)   | 100.2(4)                        | 79.3(4)   | 89.1(4)                                               | 95.1(3)                                               | 74.1(1)                          | 73.2(3)                          | 72.7(3)  | 72.7(3)                          | 76.3(3)  | 76.9(3)  |
|                                                                                                                                                                         | <b>O7/O9</b>                        | 98.6(1)                         | 103.3(1)  | 101.5(2)                        | 100.4(4)  | 100.9(3)                                              | 98.6(3)                                               | 100.5(1)                         | 98.7(3)                          | 104.3(2) | 113.1(2)                         | 101.8(6) | 94.3(7)  |
|                                                                                                                                                                         | <b>O8/O9</b><br>or<br><b>N8/O9</b>  | 88.67(9)                        | 88.3(1)   | 83.8(3)                         | 93.9(1)   | 86.9(3)                                               | 101.7(2)                                              | 83.96(9)                         | 81.5(3)                          | 82.3(2)  | 90.5(3)                          | 84.1(5)  | 88.6(7)  |

**Table S5.** Dihedral angles ( $\angle \text{XX}'$  and  $\angle \text{YY}'$ , °) between the opposite aryl units of **3** and its  $\Delta$  (°) for complexes  $3_2\text{-Mn}_4(\text{dmf})_4$ ,  $3_2\text{-Mn}_4(\text{dmf})_2(\text{H}_2\text{O})_2$ ,  $3_2\text{-Mn}_4(\text{bipy})_2$  and  $3_2\text{-Mn}_4(\text{phen})_2$ , and comparison with those earlier reported for compounds  $1_2\text{-Mn}_4(\text{dmf})_6^2$ ,  $1_2\text{-Mn}_4(\text{dmf})_4(\text{H}_2\text{O})_2^2$ ,  $2_2\text{-Mn}_4(\text{bipy})_2(\text{MeOH})_2^3$ .

|                                                     | $3_2\text{-Mn}_4(\text{dmf})_4$ |         | $1_2\text{-Mn}_4(\text{dmf})_6$ | $3_2\text{-Mn}_4(\text{dmf})_2(\text{H}_2\text{O})_2$ | $1_2\text{-Mn}_4(\text{dmf})_4(\text{H}_2\text{O})_2$ | $3_2\text{-Mn}_4(\text{bipy})_2$ | $2_2\text{-Mn}_4(\text{bipy})_2$ |                     | $3_2\text{-Mn}_4(\text{phen})_2$ |         |
|-----------------------------------------------------|---------------------------------|---------|---------------------------------|-------------------------------------------------------|-------------------------------------------------------|----------------------------------|----------------------------------|---------------------|----------------------------------|---------|
|                                                     | Mol(A)                          | Mol(B)  |                                 |                                                       |                                                       |                                  | Mol(A)                           | Mol(B)              | Mol(A)*                          | Mol(B)* |
| $\angle \text{XX}'$ , °                             | 59.5(3)                         | 62.3(1) | 54.01(9)                        | 49.5(3)                                               | 55.2(3)                                               | 62.6(1)                          | 62.5(3)                          | 66.2(3)<br>66.64(3) | 70.6(5)                          | 53.0(6) |
| $\angle \text{YY}'$ , °                             | 61.5(2)                         | 47.8(2) | 75.3(1)                         | 76.3(3)                                               | 75.6(2)                                               | 65.7(1)                          | 70.3(4)                          | 60.7(3)<br>73.6(3)  | 71.4(5)                          | 73.3(7) |
| $\Delta(\angle \text{YY}' - \angle \text{XX}')$ , ° | 2.0(3)                          | 14.5(2) | 21.29(9)                        | 26.8(3)                                               | 20.4(3)                                               | 3.1(1)                           | 7.8(5)                           | 0.44(4)<br>12.9(4)  | 0.8(7)                           | 20.3(9) |

**Table S6.** The CShM deviation values, calculated by SHAPE program<sup>4</sup>, for Mn(III) atoms in  $3_2\text{-Mn}_4(\text{dmf})_4$ ,  $3_2\text{-Mn}_4(\text{dmf})_2(\text{H}_2\text{O})_2$ ,  $3_2\text{-Mn}_4(\text{bipy})_2$  and  $3_2\text{-Mn}_4(\text{phen})_2$ , and comparison with those earlier reported for compounds  $1_2\text{-Mn}_4(\text{dmf})_6^2$ ,  $1_2\text{-Mn}_4(\text{dmf})_4(\text{H}_2\text{O})_2^2$ ,  $2_2\text{-Mn}_4(\text{bipy})_2(\text{MeOH})_2^3$ .

| Complex name                                          | Mn    | PP-5   | vOC-5 | TBPY-5 | SPY-5 | JTBPY-5 | HP-6   | PPY-6  | OC-6  | TPR-6  | JPPY-6 |
|-------------------------------------------------------|-------|--------|-------|--------|-------|---------|--------|--------|-------|--------|--------|
| $3_2\text{-Mn}_4(\text{dmf})_4$                       | Mn(A) | 27.656 | 0.627 | 6.671  | 1.423 | 8.564   | -      | -      | -     | -      | -      |
|                                                       | Mn(B) | 26.950 | 0.687 | 6.808  | 1.622 | 8.648   | -      | -      | -     | -      | -      |
| $1_2\text{-Mn}_4(\text{dmf})_6$                       | Mn(A) | -      | -     | -      | -     | -       | 32.153 | 26.994 | 0.887 | 14.753 | 30.544 |
| $3_2\text{-Mn}_4(\text{dmf})_2(\text{H}_2\text{O})_2$ | Mn(A) | 27.345 | 0.632 | 6.446  | 1.612 | 8.238   | -      | -      | -     | -      | -      |
| $1_2\text{-Mn}_4(\text{dmf})_4(\text{H}_2\text{O})_2$ | Mn(A) | -      | -     | -      | -     | -       | 32.757 | 27.904 | 0.812 | 14.782 | 30.958 |
| $3_2\text{-Mn}_4(\text{bipy})_2$                      | Mn(A) | 27.857 | 0.582 | 6.884  | 1.497 | 8.756   | -      | -      | -     | -      | -      |

|                                                 |        |        |       |       |       |       |                         |                         |                       |                         |                         |
|-------------------------------------------------|--------|--------|-------|-------|-------|-------|-------------------------|-------------------------|-----------------------|-------------------------|-------------------------|
| $2_2\text{-Mn}_4(\text{bipy})_2(\text{MeOH})_2$ | Mn(A)  | -      | -     | -     | -     | -     | 31.571                  | 27.601                  | 1.146                 | 15.793                  | 30.802                  |
|                                                 | Mn(B)  | -      | -     | -     | -     | -     | 32.139<br>and<br>31.024 | 27.568<br>and<br>26.482 | 1.190<br>and<br>1.227 | 15.026<br>and<br>14.603 | 30.728<br>and<br>30.007 |
| $3_2\text{-Mn}_4(\text{phen})_2$                | Mn(A)* | 29.371 | 0.500 | 6.079 | 1.360 | 8.122 | -                       | -                       | -                     | -                       | -                       |
|                                                 | Mn(B)* | 26.648 | 1.181 | 7.405 | 2.000 | 9.356 | -                       | -                       | -                     | -                       | -                       |

| Label   | Symmetry        | Shape                                          |
|---------|-----------------|------------------------------------------------|
| PP-5    | D <sub>5h</sub> | Pentagon                                       |
| vOC-5   | C <sub>4v</sub> | Vacant octahedron (Johnson square pyramid, J1) |
| TBPY-5  | D <sub>3h</sub> | Trigonal bipyramid                             |
| SPY-5   | C <sub>4v</sub> | Square pyramid                                 |
| JTBPY-5 | D <sub>3h</sub> | Johnson trigonal bipyramid (J12)               |
| HP-6    | D <sub>6h</sub> | Hexagon                                        |
| PPY-6   | C <sub>5v</sub> | Pentagonal pyramid                             |
| OC-6    | O <sub>h</sub>  | Octahedron                                     |
| TPR-6   | D <sub>3h</sub> | Trigonal prism                                 |
| JPPY-6  | C <sub>5v</sub> | Johnson pentagonal pyramid (J2)                |

**Table S7.** The CShM deviation values, calculated by SHAPE program<sup>4</sup>, for Mn(II) atoms in  $3_2\text{-Mn}_4(\text{dmf})_4$ ,  $3_2\text{-Mn}_4(\text{dmf})_2(\text{H}_2\text{O})_2$ ,  $3_2\text{-Mn}_4(\text{bipy})_2$  and  $3_2\text{-Mn}_4(\text{phen})_2$ , and comparison with those earlier reported for compounds  $1_2\text{-Mn}_4(\text{dmf})_6$ <sup>2</sup>,  $1_2\text{-Mn}_4(\text{dmf})_4(\text{H}_2\text{O})_2$ <sup>2</sup>,  $2_2\text{-Mn}_4(\text{bipy})_2(\text{MeOH})_2$ <sup>3</sup>.

| Complex name                                          | Mn     | HP-6                    | PPY-6                   | OC-6                  | TPR-6                  | JPPY-6                  |
|-------------------------------------------------------|--------|-------------------------|-------------------------|-----------------------|------------------------|-------------------------|
| $3_2\text{-Mn}_4(\text{dmf})_4$                       | Mn(A)  | 31.283                  | 24.538                  | 1.534                 | 12.353                 | 27.927                  |
|                                                       | Mn(B)  | 32.256                  | 23.273                  | 2.047                 | 12.110                 | 26.614                  |
| $1_2\text{-Mn}_4(\text{dmf})_6$                       | Mn(A)* | 30.240                  | 24.104                  | 1.572                 | 12.472                 | 28.189                  |
|                                                       | Mn(B)* | 32.148                  | 22.605                  | 2.220                 | 10.676                 | 25.697                  |
| $3_2\text{-Mn}_4(\text{dmf})_2(\text{H}_2\text{O})_2$ | Mn(A)  | 31.283                  | 23.291                  | 1.923                 | 11.591                 | 26.443                  |
| $1_2\text{-Mn}_4(\text{dmf})_4(\text{H}_2\text{O})_2$ | Mn(A)  | 30.652                  | 23.408                  | 1.646                 | 11.258                 | 27.393                  |
| $3_2\text{-Mn}_4(\text{bipy})_2$                      | Mn(A)  | 29.952                  | 19.692                  | 3.100                 | 11.093                 | 22.707                  |
|                                                       | Mn(A)  | 29.764                  | 19.721                  | 3.291                 | 10.615                 | 22.741                  |
| $2_2\text{-Mn}_4(\text{bipy})_2(\text{MeOH})_2$       | Mn(A)  | 27.130<br>and<br>29.493 | 22.664<br>and<br>17.971 | 2.792<br>and<br>4.053 | 12.383<br>and<br>9.875 | 25.970<br>and<br>20.902 |
|                                                       | Mn(B)  | 30.860                  | 20.330                  | 2.406                 | 11.480                 | 23.446                  |
| $3_2\text{-Mn}_4(\text{phen})_2$                      | Mn(A)* | 30.860                  | 20.330                  | 2.406                 | 11.480                 | 23.446                  |
|                                                       | Mn(B)* | 30.396                  | 20.177                  | 3.117                 | 8.859                  | 23.746                  |

**Table S8.** For obtained complexes, the oxidation state of Mn1 and Mn2 atoms calculated, using BVS method [5].

| Complex name                                          | BVS Mn1 | BVS Mn2 |
|-------------------------------------------------------|---------|---------|
| $3_2\text{-Mn}_4(\text{dmf})_4$                       | 2.996   | 1.953   |
| $3_2\text{-Mn}_4(\text{dmf})_2(\text{H}_2\text{O})_2$ | 2.994   | 1.940   |
| $3_2\text{-Mn}_4(\text{bipy})_2$                      | 2.967   | 1.921   |
| $3_2\text{-Mn}_4(\text{phen})_2$                      | 3.473   | 2.209   |

**Table S9.** The Mn...Mn bond distances and angles within the {Mn<sub>4</sub>} cluster units for obtained complexes  $3_2\text{-Mn}_4(\text{dmf})_4$ ,  $3_2\text{-Mn}_4(\text{dmf})_2(\text{H}_2\text{O})_2$ ,  $3_2\text{-Mn}_4(\text{bipy})_2$  and  $3_2\text{-Mn}_4(\text{phen})_2$ , and comparison with those earlier reported for compounds  $1_2\text{-Mn}_4(\text{dmf})_6$ <sup>2</sup>,  $1_2\text{-Mn}_4(\text{dmf})_4(\text{H}_2\text{O})_2$ <sup>2</sup>,  $2_2\text{-Mn}_4(\text{bipy})_2(\text{MeOH})_2$ <sup>3</sup>.

|                                                            | $3_2\text{-Mn}_4(\text{dmf})_4$ |           | $1_2\text{-Mn}_4(\text{dmf})_6$ | $3_2\text{-Mn}_4(\text{dmf})_2(\text{H}_2\text{O})_2$ | $1_2\text{-Mn}_4(\text{dmf})_4(\text{H}_2\text{O})_2$ | $3_2\text{-Mn}_4(\text{bipy})_2$ | $2_2\text{-Mn}_4(\text{bipy})_2$ |                        | $3_2\text{-Mn}_4(\text{phen})_2$ |          |
|------------------------------------------------------------|---------------------------------|-----------|---------------------------------|-------------------------------------------------------|-------------------------------------------------------|----------------------------------|----------------------------------|------------------------|----------------------------------|----------|
|                                                            | Mol(A)                          | Mol(B)    |                                 |                                                       |                                                       |                                  | Mol(A)                           | Mol(B)                 | Mol(A)*                          | Mol(B)*  |
| $d_{\text{Mn}(1)\text{-Mn}(2)}, \text{\AA}$                | 3.243(1)                        | 3.254(1)  | 3.2906(5)                       | 3.233(2)                                              | 3.264(6)                                              | 3.1925(9)                        | 3.224(2)                         | 3.288(2)<br>3.360(2)   | 3.271(6)                         | 3.119(8) |
| $d_{\text{Mn}(1)\text{-Mn}(2)'}', \text{\AA}$              | 3.202(1)                        | 3.255(1)  | 3.3021(5)                       | 3.235(2)                                              | 3.307(7)                                              | 3.215(1)                         | 3.280(2)                         | 3.296(2)<br>3.265(2)   | 3.108(8)                         | 3.37(1)  |
| $d_{\text{Mn}(1)\text{-Mn}(1)'}, \text{\AA}$               | 5.581(2)                        | 5.616(2)  | 5.7556(6)                       | 5.577(2)                                              | 5.68(1)                                               | 5.577(1)                         | 5.664(2)                         | 5.789(2)               | 5.553(8)                         | 5.68(1)  |
| $d_{\text{Mn}(2)\text{-Mn}(2)'}, \text{\AA}$               | 3.224(1)                        | 3.292(1)  | 3.2151(6)                       | 3.276(2)                                              | 3.304(7)                                              | 3.1554(9)                        | 3.197(2)                         | 3.177(2)               | 3.144(8)                         | 3.16(1)  |
| $\angle_{\text{Mn}(2)\text{-Mn}(1)\text{-Mn}(2)'}, ^\circ$ | 60.03(2)                        | 60.75(2)  | 58.38(1)                        | 60.85(4)                                              | 60.37(4)                                              | 59.00(2)                         | 58.88(4)                         | 57.09(4)<br>57.93(4)   | 59.0(2)                          | 58.1(2)  |
| $\angle_{\text{Mn}(1)\text{-Mn}(2)\text{-Mn}(1)'}, ^\circ$ | 119.97(2)                       | 119.25(2) | 121.62(1)                       | 119.15(5)                                             | 119.63(6)                                             | 121.00(2)                        | 121.12(6)                        | 123.12(6)<br>121.83(2) | 121.0(2)                         | 121.9(3) |

**Table S10.** The  $\{\text{Mn}_4\} \dots \{\text{Mn}_4\}$  cluster units distances and dihedral angle ( $\angle$ ,  $^\circ$ ) between the molecules of  $3_2\text{-Mn}_4(\text{dmf})_4$ ,  $3_2\text{-Mn}_4(\text{dmf})_2(\text{H}_2\text{O})_2$ ,  $3_2\text{-Mn}_4(\text{bipy})_2$  and  $3_2\text{-Mn}_4(\text{phen})_2$ , denoted as dihedral angle between the planes, built on four C-atoms of  $\text{CH}_2$ -bridging moieties of **3**, belonging to adjacent coordination species within crystal packing, presented in comparison with those earlier reported for compounds  $1_2\text{-Mn}_4(\text{dmf})_6^2$ ,  $1_2\text{-Mn}_4(\text{dmf})_4(\text{H}_2\text{O})_2^2$ ,  $2_2\text{-Mn}_4(\text{bipy})_2(\text{MeOH})_2^3$ .

|                                                                         | $3_2\text{-Mn}_4(\text{dmf})_4$ | $1_2\text{-Mn}_4(\text{dmf})_6$ | $3_2\text{-Mn}_4(\text{dmf})_2(\text{H}_2\text{O})_2$ | $1_2\text{-Mn}_4(\text{dmf})_4(\text{H}_2\text{O})_2$ | $3_2\text{-Mn}_4(\text{bipy})_2$ | $2_2\text{-Mn}_4(\text{bipy})_2(\text{MeOH})_2$ | $3_2\text{-Mn}_4(\text{phen})_2$ |
|-------------------------------------------------------------------------|---------------------------------|---------------------------------|-------------------------------------------------------|-------------------------------------------------------|----------------------------------|-------------------------------------------------|----------------------------------|
| $d_{\{\text{Mn}_4\}\text{centr}-\{\text{Mn}_4\}\text{centr}}, \text{Å}$ | 14.296(6)                       | 12.5350(8)                      | 14.071(3)                                             | 12.47(3)                                              | 16.357(3)                        | 10.9280(4)                                      | 13.162(3)                        |
|                                                                         | 16.780(3)                       | 13.3430(7)                      | 16.059(2)                                             | 12.76(3)                                              | 17.375(3)                        | 11.1261(2)                                      | 18.609(3)                        |
|                                                                         | 17.502(5)                       | 19.3706(9)                      | 21.891(4)                                             | 18.94(4)                                              | 18.043(4)                        | 12.0689(5)                                      | 19.513(3)                        |
| $\angle, ^\circ$                                                        | 89.35(6)                        | 36.32(4)                        | 84.7(1)                                               | 0                                                     | 78.62(5)                         | 24.9(1)                                         | 66.4(3)                          |

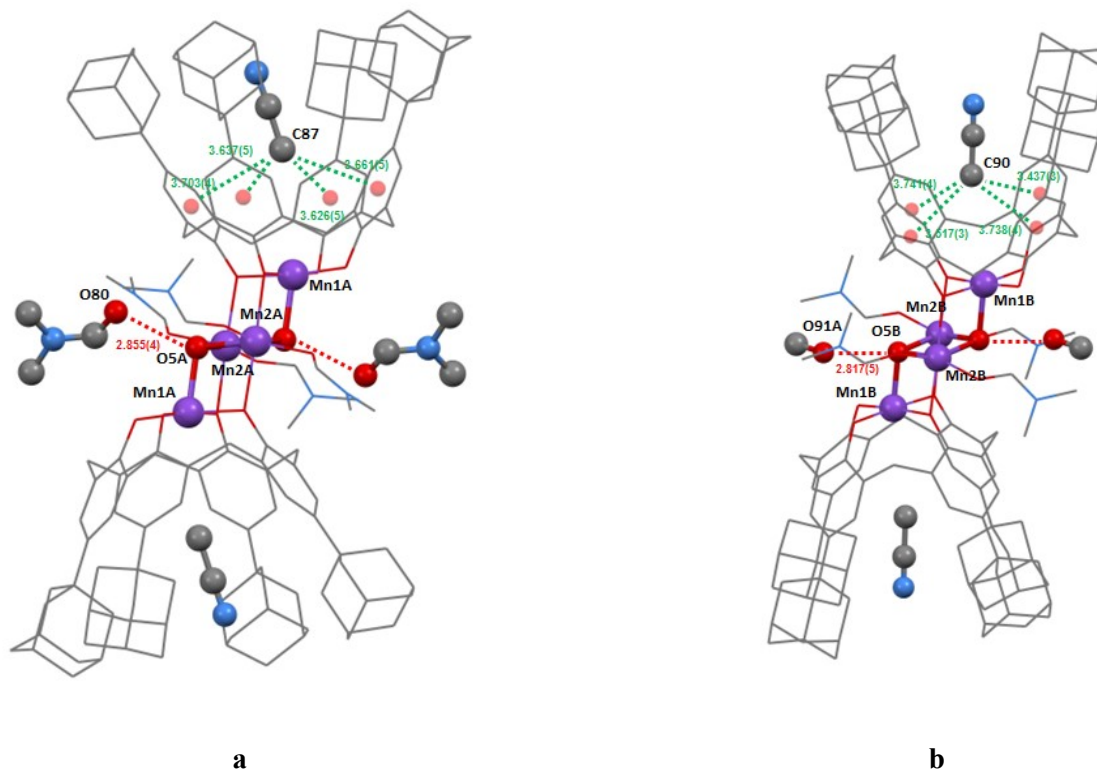

**Figure S2.** For  $3_2\text{-Mn}_4(\text{dmf})_4$ , a formation of solvates, due to  $\text{CH}/\pi$ - and H-bonding interactions, with  $\text{CH}_3\text{CN}$  and DMF molecules for  $3_2\text{-Mn}_4(\text{dmf})_4\text{-A}$  (a) and with  $\text{CH}_3\text{CN}$  and MeOH molecules for  $3_2\text{-Mn}_4(\text{dmf})_4\text{-B}$  (b).



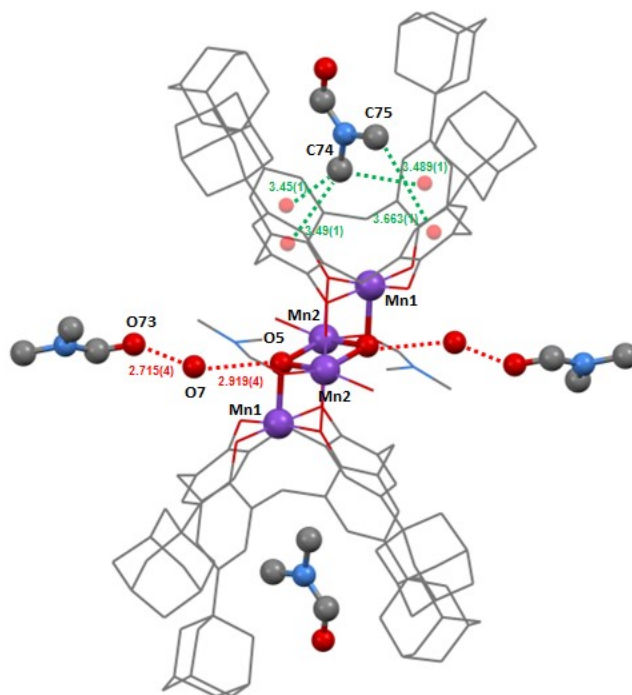

**Figure S3.** For  $3_2\text{-Mn}_4(\text{dmf})_2(\text{H}_2\text{O})_2$ , the formation of solvates, supported by CH/ $\pi$ - and H-bonding interactions, with DMF and  $\text{H}_2\text{O}$  molecules.

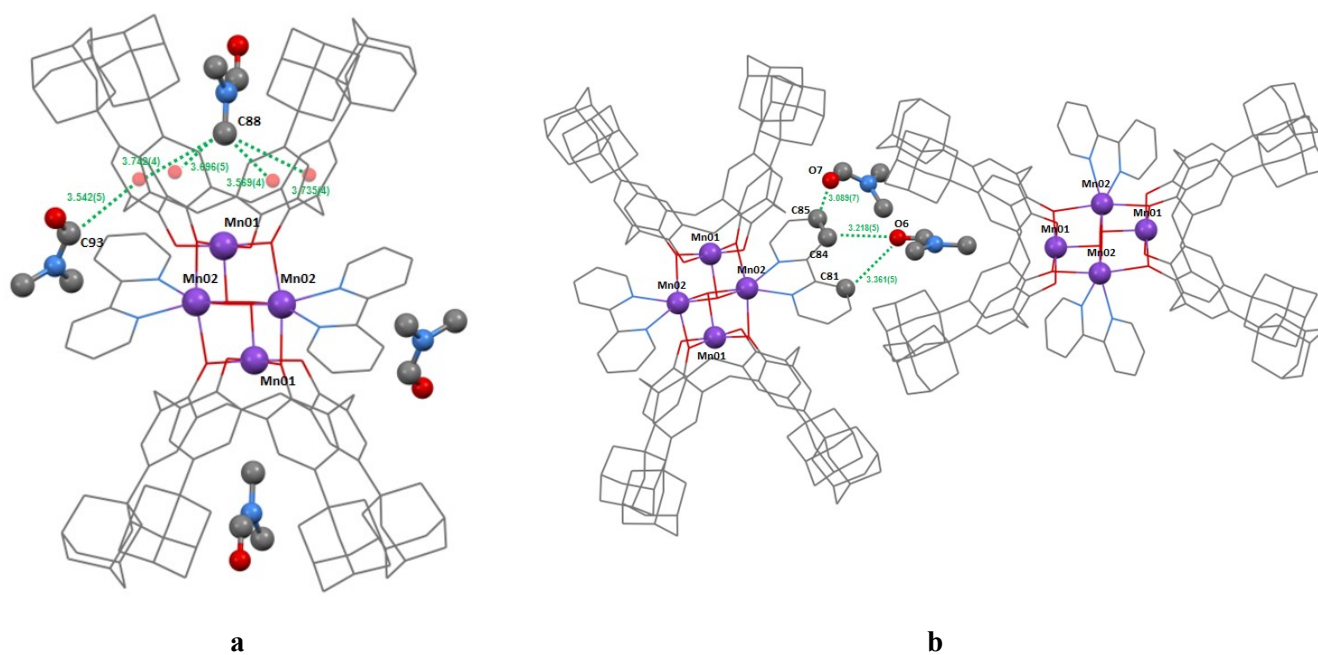

**Figure S4.** For  $3_2\text{-Mn}_4(\text{bipy})_2$ , (a) the formation of solvate with DMF molecules, supported by CH/ $\pi$ -interactions, involving C(88)-atom of accommodated DMF molecule located inside the calix[4]arene cavity or C(93) -atom belonging to carbonyl group, belonging to DMF molecule, disposed outside the calix[4]arene cavity with a aryl units of the calix[4]arene platform, and (b) the short contacts between the O(7)-carbonyl atom of DMF molecule with C(81)-, C(84)- and C(85)-atoms belonging to **bipy** molecule.

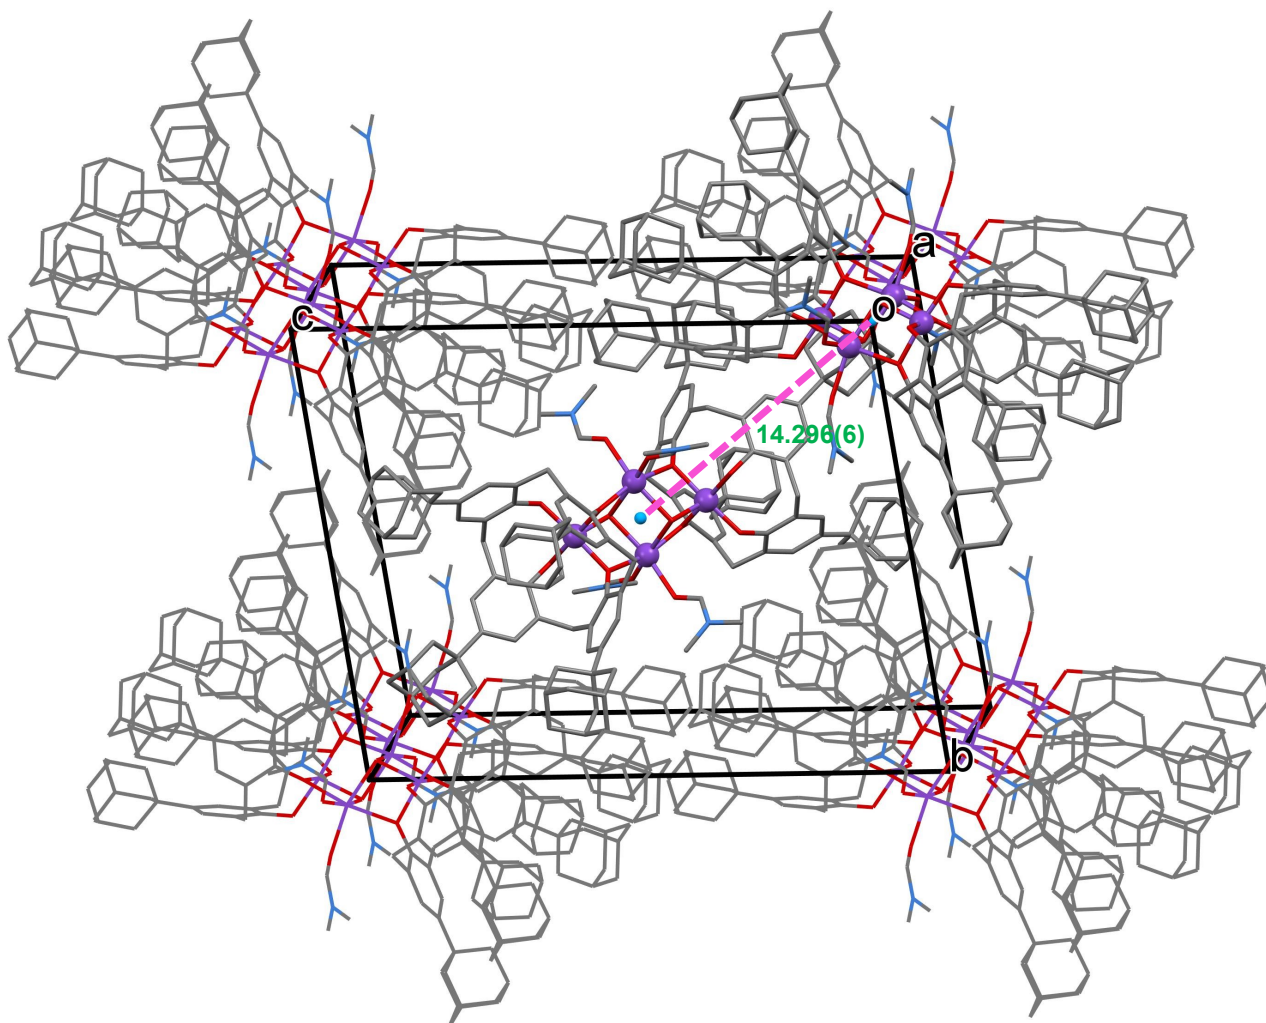

**Figure S5.** For  $3_2\text{-Mn}_4(\text{dmf})_4$ , a portion of crystal packing, showing the shortest  $\{\text{Mn}_4\} \dots \{\text{Mn}_4\}$  distance between  $3_2\text{-Mn}_4(\text{dmf})_4\text{-A}$  and  $3_2\text{-Mn}_4(\text{dmf})_4\text{-B}$  molecules.

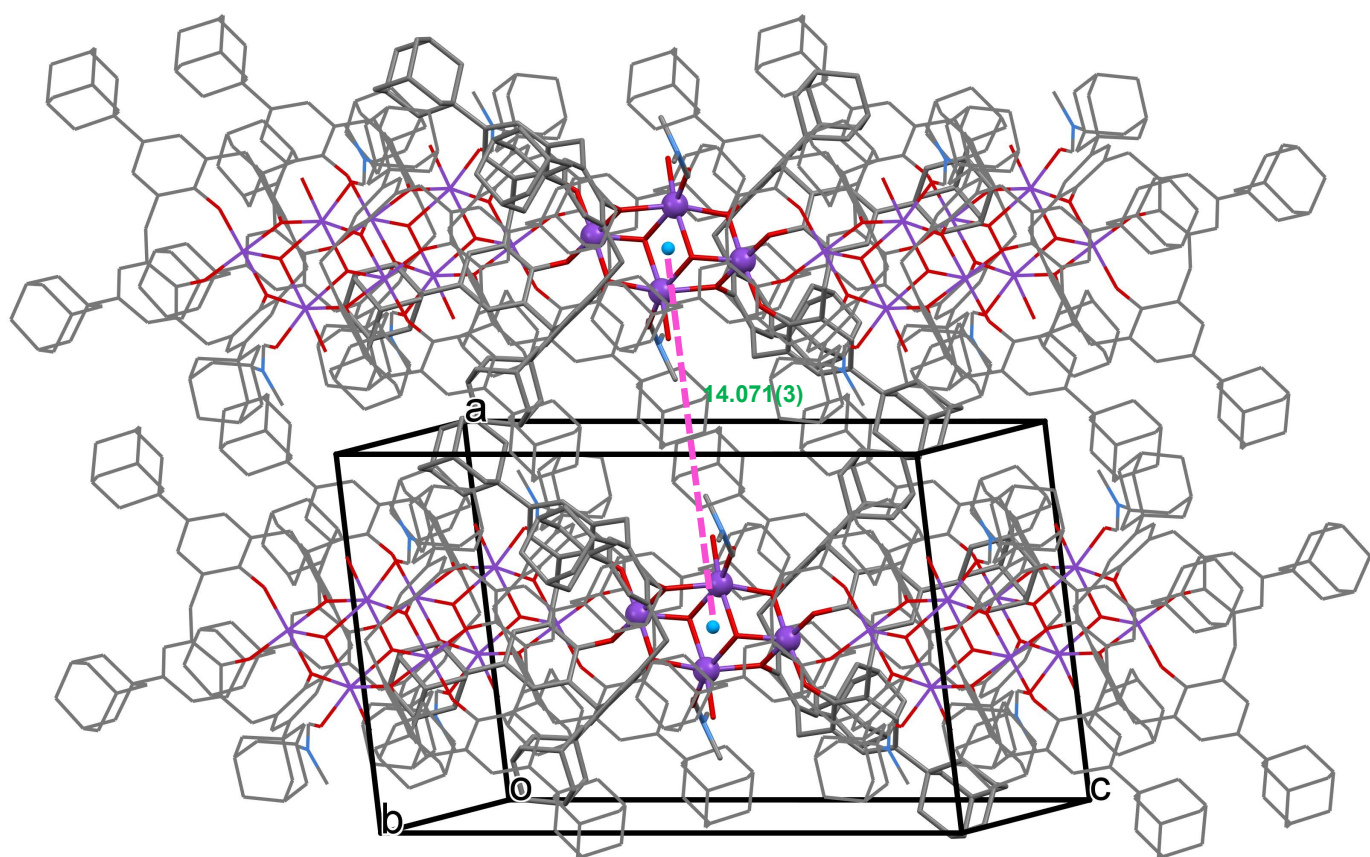

**Figure S6.** For  $3_2\text{-Mn}_4(\text{dmf})_2(\text{H}_2\text{O})_2$ , a portion of crystal packing, showing the shortest  $\{\text{Mn}_4\} \dots \{\text{Mn}_4\}$  distance.

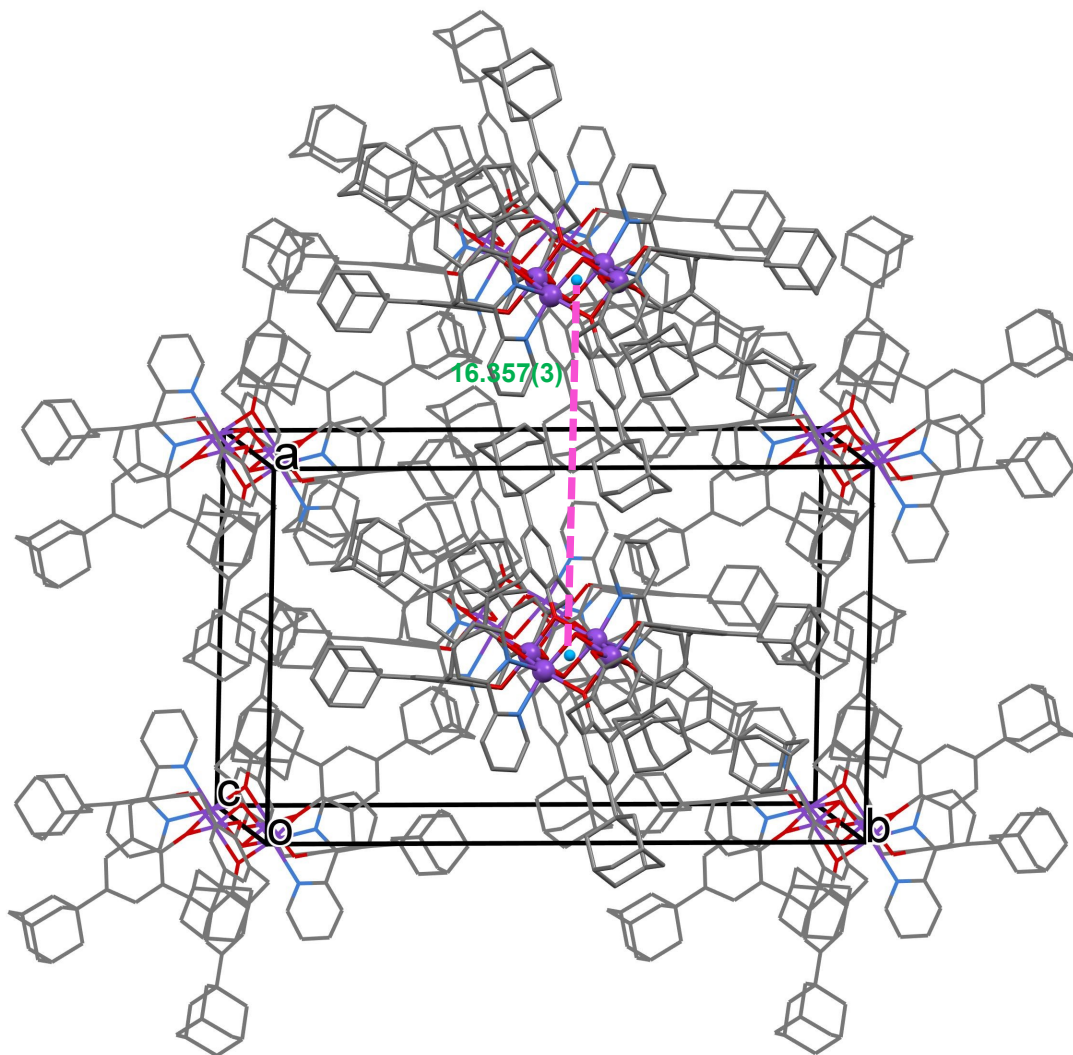

**Figure S7.** For  $3,3'$ - $\text{Mn}_4(\text{bipy})_2$ , a portion of crystal packing, showing the shortest  $\{\text{Mn}_4\} \dots \{\text{Mn}_4\}$  distance.

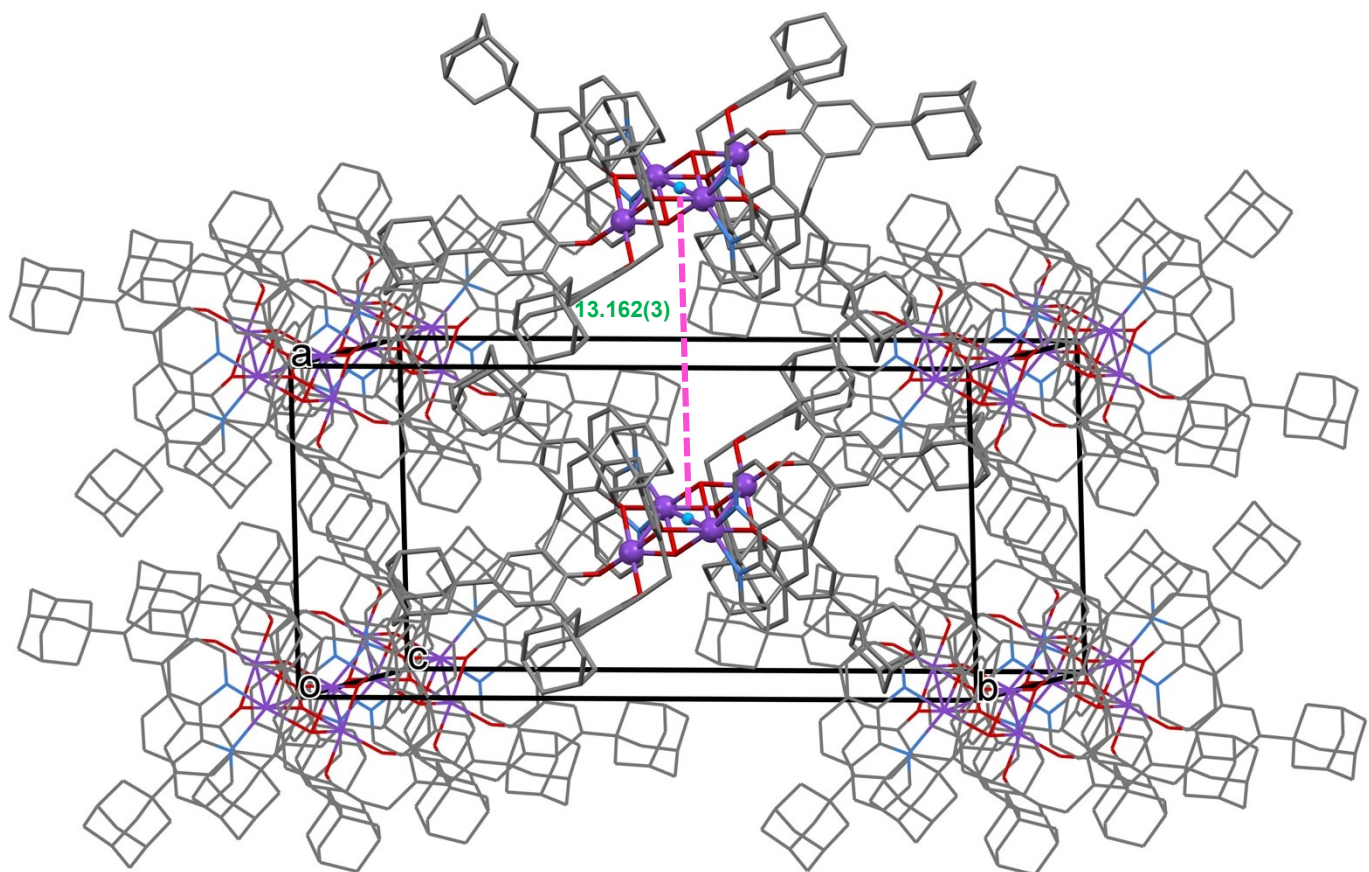

**Figure S8.** For  $3_2\text{-Mn}_4(\text{phen})_2$ , a portion of crystal packing, showing the shortest  $\{\text{Mn}_4\} \dots \{\text{Mn}_4\}$  distance.

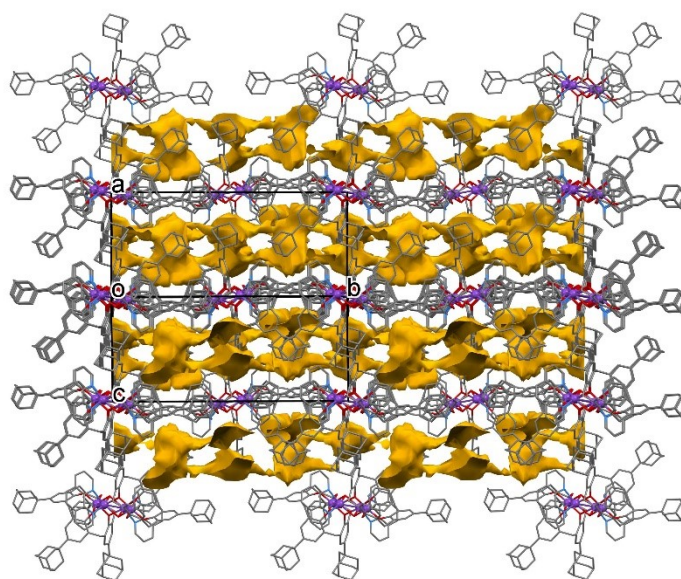

**Figure S9.** For  $3_2\text{-Mn}_4(\text{phen})_2$ , a portion of crystal packing, showing the pores, located in the interstices between the cluster species.

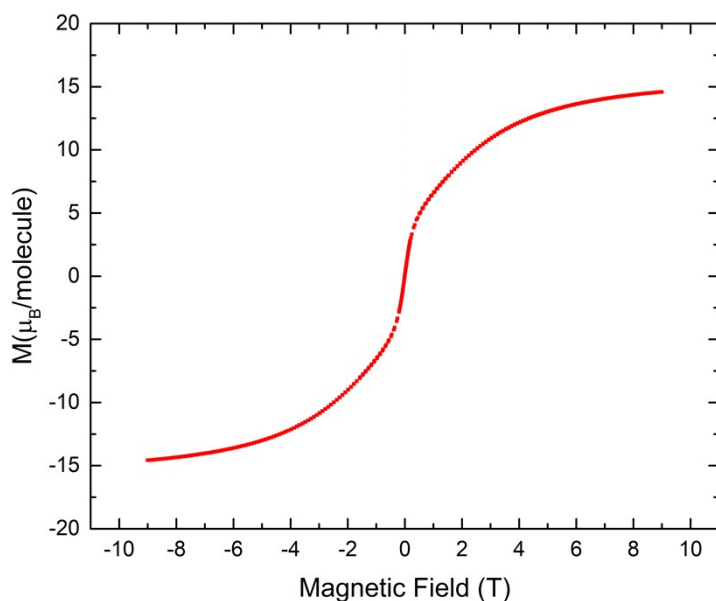

**Figure S10.** For  $3_2\text{-Mn}_4(\text{phen})_2$ , a field-dependent magnetization, measured at  $T=2\text{K}$ .

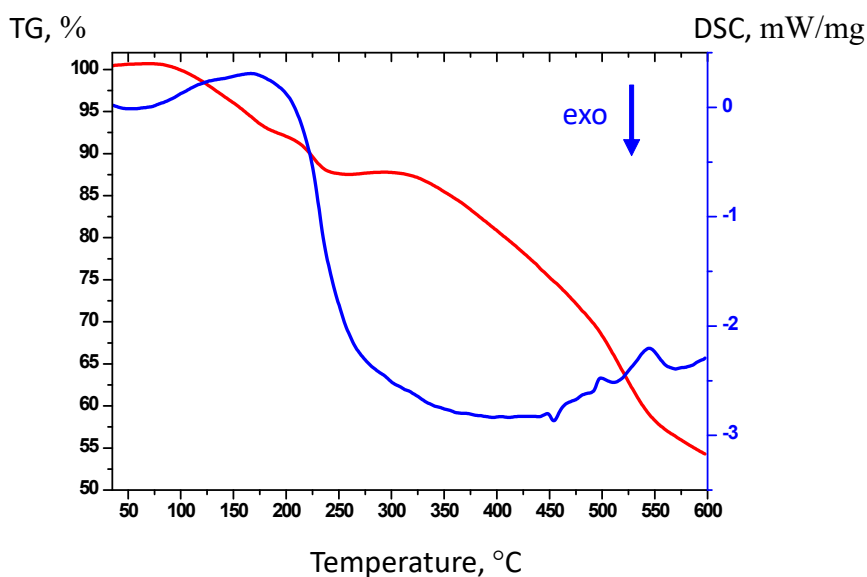

**Figure S11.** TG (red) DSC (blue) traces for  $3_2\text{-Mn}_4(\text{dmf})_2(\text{H}_2\text{O})_2$ . The samples release solvent molecules starting from 100 °C till 252 °C in two steps. The first step observed in the temperature range from 100 C till 182 is consistent with 8.40 % of mass loss which can be associated with the release of two DMF, two noncoordinated and two coordinated  $\text{H}_2\text{O}$  molecules (calculated mass loss 8.62%). The second step, revealed at 182-252 °C temperature range, corresponds to mass loss of 5.42%, can be consistent with the release of two remained DMF molecules (calculated mass loss 5.8%). The quantity of released solvent molecules was found to be in in good accordance with single crystal X-ray diffraction analysis. The complex decomposes, starting from 312 °C.

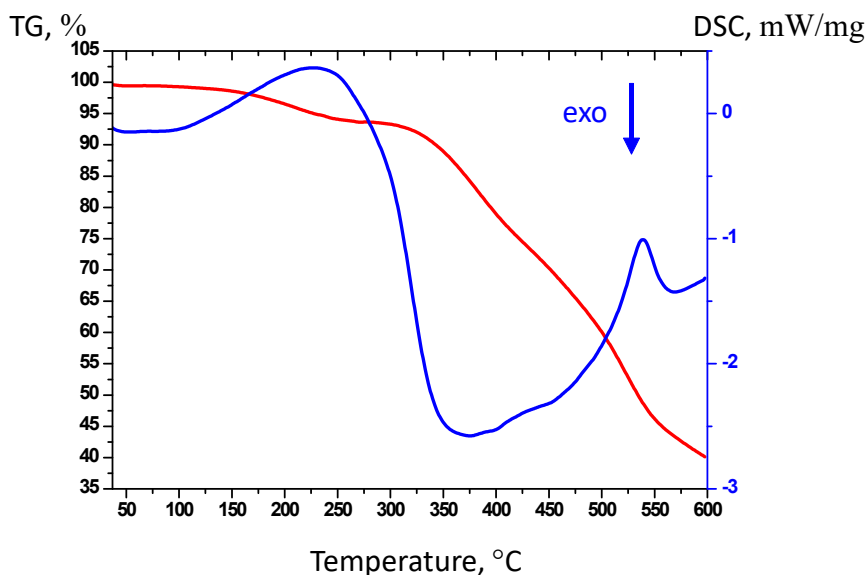

**Figure S12.** TG (red) DSC (blue) traces for  $3_2\text{-Mn}_4(\text{bipy})_2$ . The sample releases solvent molecules, starting from 126 °C till 263 °C. The corresponding mass loss of 6.25% can be associated with the release of 2 DMF molecules, presenting in the crystal lattice (calculated mass loss 5.56%), which corresponds reduced quantity of solvent molecules, refined by single crystal X-ray diffraction analysis. The complex decomposes, starting from 310 °C.

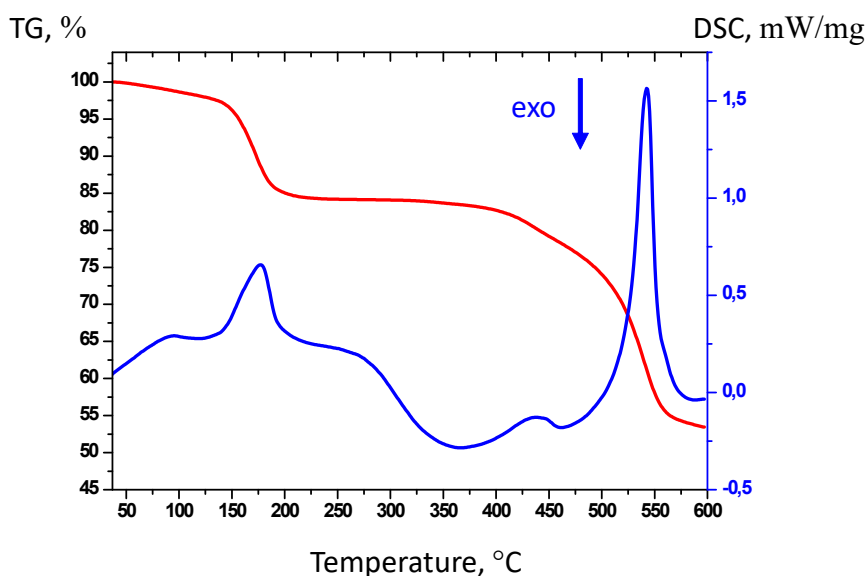

**Figure S13.** TG (red) DSC (blue) traces for  $3_2\text{-Mn}_4(\text{phen})_2$ . The overall mass loss, observed from 30 °C till 210 °C, was found to be equal 15.87%, which can be associated with the release of 1 MeCN, 2 MeOH and 5 DMF molecules, presenting in pores (calculated mass loss 15.7%). The complex decomposes, starting from 350 °C.

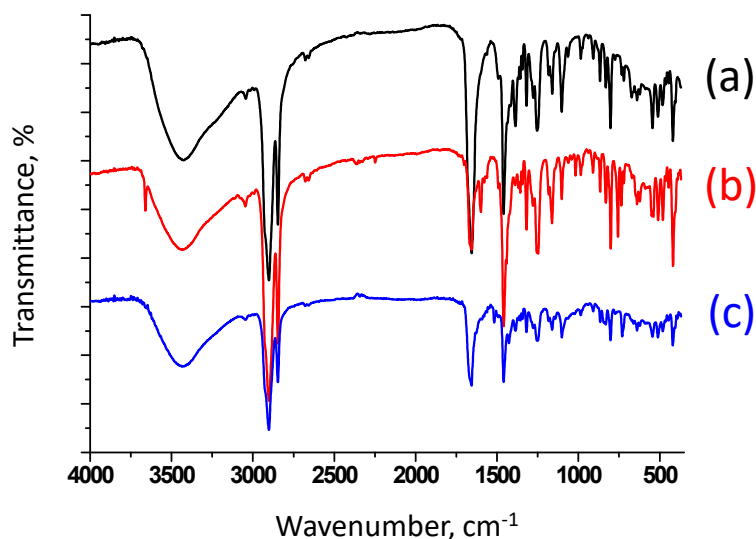

**Figure S14.** IR-spectra of  $3_2\text{-Mn}_4(\text{dmf})_2(\text{H}_2\text{O})_2$  (a),  $3_2\text{-Mn}_4(\text{bipy})_2$  (b),  $3_2\text{-Mn}_4(\text{phen})_2$  (c), recorded at 25 °C in KBr pellets.

## References

- 1 A. L. Spek, *J. Appl. Crystallogr.*, 2003, **36**, 7.
2. S. M. Taylor, G. Karotsis, R. D. McIntosh, S. Kennedy, S. J. Teat, C. M. Beavers, W. Wernsdorfer, S. Piligkos, S. J. Dalgarno, E. K. Brechin, *Chemistry-A European Journal*, 2011, **17**, 7521.
3. S. M. Aldoshin, I. S. Antipin, S. E. Solov'eva, N.A. Sanina, D. V. Korchagin, G. V. Shilov, F. B. Mushenok, A. N. Utenyshev, K. V. Bozhenko, *J. Mol. Struct.*, 2015, **1081** 217.
4. M. Llunell, D. Casanova, J. Cirera, J. M. Bofill, P. Alemany, S. Alvarez, M. Pinsky, D. Avnir, SHAPE, version 2.3, University of Barcelona, Barcelona, Spain, and Hebrew University of Jerusalem, Jerusalem, Israel, 2013.
5. I. D. Brown, *The Chemical Bond in Inorganic Chemistry: The Bond Valence Model*, published by Oxford University Press, 2002.
